# Supplementary material for: An IFIH1 gene polymorphism associated with risk for autoimmunity regulates canonical antiviral defence pathways in Coxsackievirus infected human pancreatic islets
Source: PubMed Central journal article supplement (PMC5175199; doi:10.1038/srep39378), 2016-12-21
Supplement: srep39378-s1.pdf [file srep39378-s1.pdf]

**SUPPLEMENTARY FIGURES AND FIGURE LEGENDS**

**An IFIH1 gene polymorphism associated with risk for autoimmunity regulates canonical antiviral defense pathways in Coxsackievirus infected human pancreatic islets**

**Erna Domsgen<sup>1,†</sup>, Katharina Lind<sup>1,†</sup>, Lingjia Kong<sup>2</sup>, Michael H. Hühn<sup>1,#</sup>, Omid Rasool<sup>2</sup>, Frank van Kuppeveld<sup>3</sup>, Olle Korsgren<sup>4</sup>, Riitta Lahesmaa<sup>2</sup>, Malin Flodström-Tullberg<sup>1,5,\*</sup>**

**Supplementary Table S1: Frequencies of rs1990760 and rs3747517 genotypes in the human islet donor cohort.**

| SNP combination                             |                 | rs3747517,<br>number of donors (%) |                 |                 |
|---------------------------------------------|-----------------|------------------------------------|-----------------|-----------------|
|                                             |                 | TT<br>843H/843H                    | TC<br>843H/843R | CC<br>843R/843R |
| rs1990760 genotype,<br>number of donors (%) | TT<br>946T/946T | 0<br>(0%)                          | 1<br>(4.3%)     | 9<br>(39.1%)    |
|                                             | TC<br>946T/946A | 1<br>(4.3%)                        | 10<br>(43.5%)   | 2<br>(8.7%)     |
|                                             | CC<br>946A/946A | 0<br>(0%)                          | 0<br>(0%)       | 0<br>(0%)       |

Total DNA was purified from all donors (n=23). Genotyping was performed using TaqMan SNP Genotyping Assay (Applied Biosystem) and custom made probes detecting the SNPs rs1990760 and rs3747517 in *IFIH1* according to manufacturer's instructions.

**Supplementary Table S2: Genes with a differentially expression in CVB3 infected as compared to uninfected human pancreatic islets, identified by RNA Seq analysis.**

| Gene ID  | logFC  | ave expr | p-value | adj. p-value | ISG |
|----------|--------|----------|---------|--------------|-----|
| ANGPTL1  | 1.6680 | 5.4121   | < 0.001 | 0.004        |     |
| ANO7P1   | 1.1182 | 2.6015   | 0.002   | 0.027        |     |
| APOBEC3G | 1.3749 | 5.9196   | < 0.001 | 0.003        | *   |
| APOL2    | 1.0204 | 8.6426   | < 0.001 | < 0.001      | *   |
| APOL3    | 1.9312 | 5.0744   | < 0.001 | 0.003        | *   |
| APOL6    | 1.1045 | 9.5803   | < 0.001 | < 0.001      | *   |
| ATF3     | 1.1785 | 8.2002   | < 0.001 | < 0.001      | *   |
| ATP10A   | 1.8773 | 4.4964   | < 0.001 | 0.004        | *   |
| BATF2    | 2.9283 | 6.0873   | < 0.001 | < 0.001      | *   |
| BRCA2    | 1.2109 | 2.2653   | 0.002   | 0.032        | *   |
| BST2     | 3.0557 | 7.1839   | < 0.001 | < 0.001      | *   |
| C19orf66 | 1.3095 | 7.1936   | < 0.001 | < 0.001      | *   |
| C3AR1    | 1.3080 | 3.6546   | < 0.001 | 0.014        |     |
| CCL3     | 3.1280 | 2.7892   | < 0.001 | 0.002        |     |
| CCL4     | 4.4167 | 2.8681   | < 0.001 | < 0.001      | *   |
| CCL5     | 4.8863 | 5.1560   | < 0.001 | 0.003        | *   |
| CCL7     | 3.0849 | 2.7217   | < 0.001 | 0.007        | *   |
| CCL8     | 5.4265 | 2.5597   | < 0.001 | < 0.001      | *   |
| CCR1     | 1.4342 | 4.2996   | < 0.001 | 0.007        | *   |
| CCR5     | 1.4459 | 2.7961   | 0.005   | 0.048        |     |
| CD274    | 2.2761 | 5.8411   | < 0.001 | < 0.001      |     |
| CD38     | 4.1035 | 2.5713   | < 0.001 | 0.005        | *   |
| CD40     | 1.0381 | 6.7912   | 0.002   | 0.032        | *   |
| CD48     | 1.6154 | 2.0165   | 0.004   | 0.043        |     |
| CDON     | 1.1147 | 6.4416   | 0.002   | 0.025        |     |
| CMPK2    | 3.1804 | 7.8305   | < 0.001 | < 0.001      | *   |
| CSF2     | 2.3567 | 3.3119   | 0.003   | 0.036        | *   |
| CSF2RB   | 1.2053 | 2.7438   | 0.004   | 0.041        | *   |
| CX3CL1   | 2.6423 | 8.9196   | < 0.001 | < 0.001      | *   |
| CXCL10   | 7.2068 | 7.0234   | < 0.001 | < 0.001      | *   |
| CXCL11   | 6.8187 | 6.0957   | < 0.001 | < 0.001      | *   |
| CXCL9    | 2.9833 | 5.0685   | 0.003   | 0.041        | *   |
| CYP2J2   | 1.6249 | 5.3773   | < 0.001 | 0.011        | *   |
| DAPP1    | 1.7108 | 4.7216   | 0.003   | 0.038        | *   |
| DDX58    | 3.1140 | 8.4626   | < 0.001 | < 0.001      | *   |
| DDX60    | 2.6847 | 8.3295   | < 0.001 | < 0.001      | *   |
| DDX60L   | 2.1386 | 7.6171   | < 0.001 | < 0.001      | *   |
| DHX58    | 2.4373 | 6.2969   | < 0.001 | < 0.001      | *   |
| DTX3L    | 1.1845 | 9.4227   | < 0.001 | < 0.001      | *   |
| EIF2AK2  | 1.5267 | 9.1297   | < 0.001 | < 0.001      | *   |
| EPSTI1   | 2.1299 | 7.9304   | < 0.001 | < 0.001      | *   |
| ETV7     | 2.1507 | 5.8934   | < 0.001 | < 0.001      | *   |
| FAM26F   | 1.6409 | 2.1275   | 0.002   | 0.025        | *   |
| FBXO6    | 1.0612 | 6.7463   | < 0.001 | 0.003        | *   |
| FPR3     | 1.2792 | 4.2031   | 0.005   | 0.046        | *   |
| GBP1     | 3.1496 | 7.4023   | < 0.001 | < 0.001      | *   |
| GBP4     | 3.8405 | 6.4380   | < 0.001 | < 0.001      | *   |
| GBP5     | 4.9161 | 2.9652   | < 0.001 | 0.002        | *   |
| GJA4     | 2.0068 | 2.6018   | 0.002   | 0.025        |     |

| Gene ID  | logFC  | ave expr | p-value | adj. p-value | ISG |
|----------|--------|----------|---------|--------------|-----|
| GMPR     | 1.9156 | 6.5507   | < 0.001 | < 0.001      | *   |
| GPR123   | 1.1373 | 3.6004   | < 0.001 | 0.018        |     |
| HELZ2    | 2.4625 | 8.8511   | < 0.001 | < 0.001      | *   |
| HERC5    | 2.8024 | 7.7210   | < 0.001 | < 0.001      | *   |
| HERC6    | 2.2861 | 8.1665   | < 0.001 | < 0.001      | *   |
| HES4     | 1.2929 | 5.8300   | 0.002   | 0.028        | *   |
| HIST1H3D | 2.8016 | 0.2008   | < 0.001 | 0.017        |     |
| HSH2D    | 2.4424 | 6.0673   | < 0.001 | < 0.001      | *   |
| IDO1     | 4.0871 | 5.6550   | < 0.001 | 0.004        | *   |
| IFI16    | 1.5503 | 7.9529   | < 0.001 | 0.008        | *   |
| IFI27    | 3.9139 | 6.6092   | < 0.001 | < 0.001      | *   |
| IFI35    | 1.9853 | 7.9441   | < 0.001 | < 0.001      | *   |
| IFI44    | 3.5327 | 6.9914   | < 0.001 | < 0.001      | *   |
| IFI44L   | 4.8202 | 6.0911   | < 0.001 | < 0.001      | *   |
| IFI6     | 2.8065 | 10.5049  | < 0.001 | < 0.001      | *   |
| IFIH1    | 2.1495 | 8.7764   | < 0.001 | < 0.001      | *   |
| IFIT1    | 4.5611 | 9.2418   | < 0.001 | < 0.001      | *   |
| IFIT2    | 4.4304 | 9.0720   | < 0.001 | < 0.001      | *   |
| IFIT3    | 4.1091 | 9.6976   | < 0.001 | < 0.001      | *   |
| IFIT5    | 1.1341 | 8.1653   | < 0.001 | < 0.001      | *   |
| IFITM1   | 3.6231 | 7.4472   | < 0.001 | < 0.001      | *   |
| IFNB1    | 6.1882 | -0.7817  | < 0.001 | 0.008        |     |
| IFNL1    | 7.8416 | 0.3314   | < 0.001 | < 0.001      |     |
| IFNL2    | 7.5010 | -0.0363  | < 0.001 | < 0.001      |     |
| IFNL3    | 7.0969 | -0.3253  | < 0.001 | < 0.001      |     |
| IL12A    | 2.2062 | 1.4745   | < 0.001 | 0.017        |     |
| IL18BP   | 1.2119 | 6.8220   | < 0.001 | 0.016        | *   |
| IL18R1   | 1.2423 | 4.1564   | < 0.001 | 0.006        |     |
| IL1RN    | 1.7166 | 6.7621   | < 0.001 | 0.007        | *   |
| IL4I1    | 2.2930 | 4.8346   | < 0.001 | < 0.001      |     |
| IRF1     | 1.3070 | 8.8445   | < 0.001 | 0.003        | *   |
| IRF7     | 2.7038 | 7.1657   | < 0.001 | < 0.001      | *   |
| ISG15    | 4.6685 | 8.7913   | < 0.001 | < 0.001      | *   |
| ISG20    | 2.2582 | 7.2391   | < 0.001 | < 0.001      | *   |
| KLHDC7B  | 2.4087 | 4.0534   | 0.002   | 0.026        |     |
| KLK10    | 2.3866 | 2.8510   | 0.004   | 0.041        |     |
| KRT6B    | 2.3302 | 5.2296   | 0.002   | 0.029        |     |
| LAMP3    | 4.1727 | 6.7808   | < 0.001 | < 0.001      | *   |
| LAP3     | 1.9876 | 8.7632   | < 0.001 | < 0.001      | *   |
| LY6E     | 2.0493 | 9.5391   | < 0.001 | 0.002        | *   |
| MAP3K8   | 1.1732 | 5.8886   | 0.004   | 0.041        |     |
| MLKL     | 2.0919 | 5.4017   | < 0.001 | < 0.001      | *   |
| MNDA     | 3.2217 | 0.5666   | < 0.001 | 0.015        |     |
| MT2A     | 1.0865 | 8.9259   | 0.003   | 0.038        | *   |
| MX1      | 3.8984 | 9.7365   | < 0.001 | < 0.001      | *   |
| MX2      | 5.0793 | 6.5469   | < 0.001 | < 0.001      | *   |
| NFKBIA   | 1.3580 | 9.3462   | 0.001   | 0.025        |     |
| NLRC5    | 1.4753 | 7.0624   | < 0.001 | 0.002        | *   |
| NMI      | 1.3269 | 7.0775   | < 0.001 | 0.003        | *   |
| NOD2     | 2.8120 | 1.5483   | < 0.001 | 0.017        | *   |
| NR1D1    | 1.2792 | 8.1482   | < 0.001 | 0.011        |     |
| NT5C3A   | 1.2672 | 8.3105   | < 0.001 | 0.010        | *   |
| NUAK2    | 1.0454 | 7.3051   | 0.005   | 0.047        |     |

| Gene ID  | logFC  | ave expr | p-value | adj. p-value | ISG |
|----------|--------|----------|---------|--------------|-----|
| OAS1     | 3.8306 | 8.5330   | < 0.001 | < 0.001      | *   |
| OAS2     | 5.3518 | 6.7840   | < 0.001 | < 0.001      | *   |
| OAS3     | 3.8714 | 8.9674   | < 0.001 | < 0.001      | *   |
| OASL     | 5.3674 | 6.7185   | < 0.001 | < 0.001      | *   |
| PARP10   | 1.5736 | 8.1975   | < 0.001 | < 0.001      | *   |
| PARP12   | 1.6433 | 8.2346   | < 0.001 | < 0.001      | *   |
| PARP14   | 1.8360 | 9.1803   | < 0.001 | < 0.001      | *   |
| PARP9    | 1.3593 | 9.2668   | < 0.001 | < 0.001      | *   |
| PLEK     | 1.3541 | 3.1828   | 0.003   | 0.039        | *   |
| PLEKHA4  | 1.5398 | 7.2098   | < 0.001 | 0.004        | *   |
| PLSCR1   | 1.4048 | 9.3150   | < 0.001 | 0.008        | *   |
| PMAIP1   | 1.2867 | 6.6753   | 0.002   | 0.026        | *   |
| PML      | 1.4283 | 8.3345   | < 0.001 | < 0.001      | *   |
| PNPT1    | 1.6906 | 7.6710   | < 0.001 | < 0.001      | *   |
| PSMB9    | 1.7392 | 7.2025   | < 0.001 | < 0.001      | *   |
| RARRES3  | 1.0809 | 6.6594   | 0.004   | 0.041        | *   |
| RBM11    | 1.1071 | 4.0179   | < 0.001 | 0.017        |     |
| RHEBL1   | 1.5204 | 0.9154   | 0.003   | 0.038        |     |
| RSAD2    | 3.7239 | 9.3255   | < 0.001 | < 0.001      | *   |
| RTP4     | 1.6606 | 6.1432   | < 0.001 | 0.001        | *   |
| SAMD9    | 2.5657 | 8.1743   | < 0.001 | < 0.001      | *   |
| SAMD9L   | 3.1415 | 6.9706   | < 0.001 | < 0.001      | *   |
| SAMHD1   | 1.9739 | 8.1743   | < 0.001 | < 0.001      | *   |
| SECTM1   | 2.1212 | 6.4486   | < 0.001 | 0.006        | *   |
| SERPINB9 | 1.0854 | 6.6196   | 0.002   | 0.027        | *   |
| SIGLEC1  | 4.1149 | 1.8549   | < 0.001 | < 0.001      | *   |
| SLC15A3  | 2.2887 | 5.2661   | < 0.001 | < 0.001      | *   |
| SLC25A28 | 1.3594 | 6.7804   | < 0.001 | < 0.001      | *   |
| SORL1    | 1.1413 | 9.5385   | 0.002   | 0.026        | *   |
| SP100    | 1.3264 | 8.7940   | < 0.001 | 0.004        | *   |
| SP110    | 2.3446 | 6.6723   | < 0.001 | < 0.001      | *   |
| STARD5   | 1.6809 | 3.5776   | < 0.001 | 0.006        | *   |
| STAT1    | 2.0124 | 10.6262  | < 0.001 | < 0.001      | *   |
| STAT2    | 1.1693 | 8.6411   | < 0.001 | 0.003        | *   |
| STX11    | 1.1859 | 3.8796   | 0.004   | 0.041        | *   |
| SUSD3    | 2.1988 | 1.0891   | 0.001   | 0.019        |     |
| TAGAP    | 1.9399 | 2.3619   | < 0.001 | < 0.001      | *   |
| TAP1     | 1.7751 | 9.2956   | < 0.001 | < 0.001      | *   |
| TAP2     | 1.6983 | 8.4546   | < 0.001 | < 0.001      | *   |
| TDRD7    | 1.1289 | 7.7630   | < 0.001 | < 0.001      | *   |
| THEMIS2  | 1.1482 | 6.4367   | < 0.001 | 0.010        | *   |
| TLDC2    | 1.3456 | 1.6951   | 0.003   | 0.038        |     |
| TMEM140  | 1.3979 | 7.7030   | < 0.001 | 0.002        | *   |
| TNF      | 2.2476 | 3.2585   | 0.002   | 0.033        | *   |
| TNFSF10  | 1.1955 | 10.1610  | 0.003   | 0.038        | *   |
| TNFSF13B | 2.9497 | 4.8577   | < 0.001 | < 0.001      | *   |
| TRANK1   | 1.4338 | 6.5278   | < 0.001 | 0.013        | *   |
| TREX1    | 1.4506 | 6.3311   | < 0.001 | < 0.001      | *   |
| TRIM14   | 1.6150 | 7.5359   | < 0.001 | < 0.001      | *   |
| TRIM21   | 1.3428 | 7.3726   | < 0.001 | 0.003        | *   |
| TRIM22   | 1.9970 | 7.9421   | < 0.001 | 0.003        | *   |
| TRIM25   | 1.3168 | 8.8707   | < 0.001 | < 0.001      | *   |
| TXNIP    | 1.1586 | 9.7417   | 0.004   | 0.044        | *   |

| Gene ID | logFC  | ave expr | p-value | adj. p-value | ISG |
|---------|--------|----------|---------|--------------|-----|
| TYMP    | 1.4427 | 8.4857   | 0.004   | 0.043        | *   |
| UBA7    | 1.2606 | 6.9539   | 0.002   | 0.028        | *   |
| UBE2L6  | 1.6487 | 8.8429   | < 0.001 | < 0.001      | *   |
| UNC93B1 | 1.3504 | 7.8263   | < 0.001 | < 0.001      | *   |
| USP18   | 2.7723 | 7.2247   | < 0.001 | < 0.001      | *   |
| WARS    | 1.2006 | 9.7545   | < 0.001 | 0.003        | *   |
| XAF1    | 4.0922 | 5.0292   | < 0.001 | < 0.001      | *   |
| ZBP1    | 5.5505 | 1.5168   | < 0.001 | < 0.001      | *   |
| ZC3HAV1 | 1.1179 | 8.5393   | < 0.001 | 0.001        | *   |
| ZNF433  | 1.1365 | 4.6235   | 0.004   | 0.041        |     |
| ZNFX1   | 1.4038 | 9.1643   | < 0.001 | < 0.001      | *   |

The logFC and the average expression (ave. expr.) for control vs. CVB3 infected islets. Genes identified as interferon stimulated genes (ISGs) by the Interferome database are marked with (\*). logFC, log<sub>2</sub> fold change (control vs CVB3 infected human islets); ave expr, average log<sub>2</sub> expression of the gene across all samples; adj. p-value, adjusted p-value; ISG, Interferon stimulated gene.

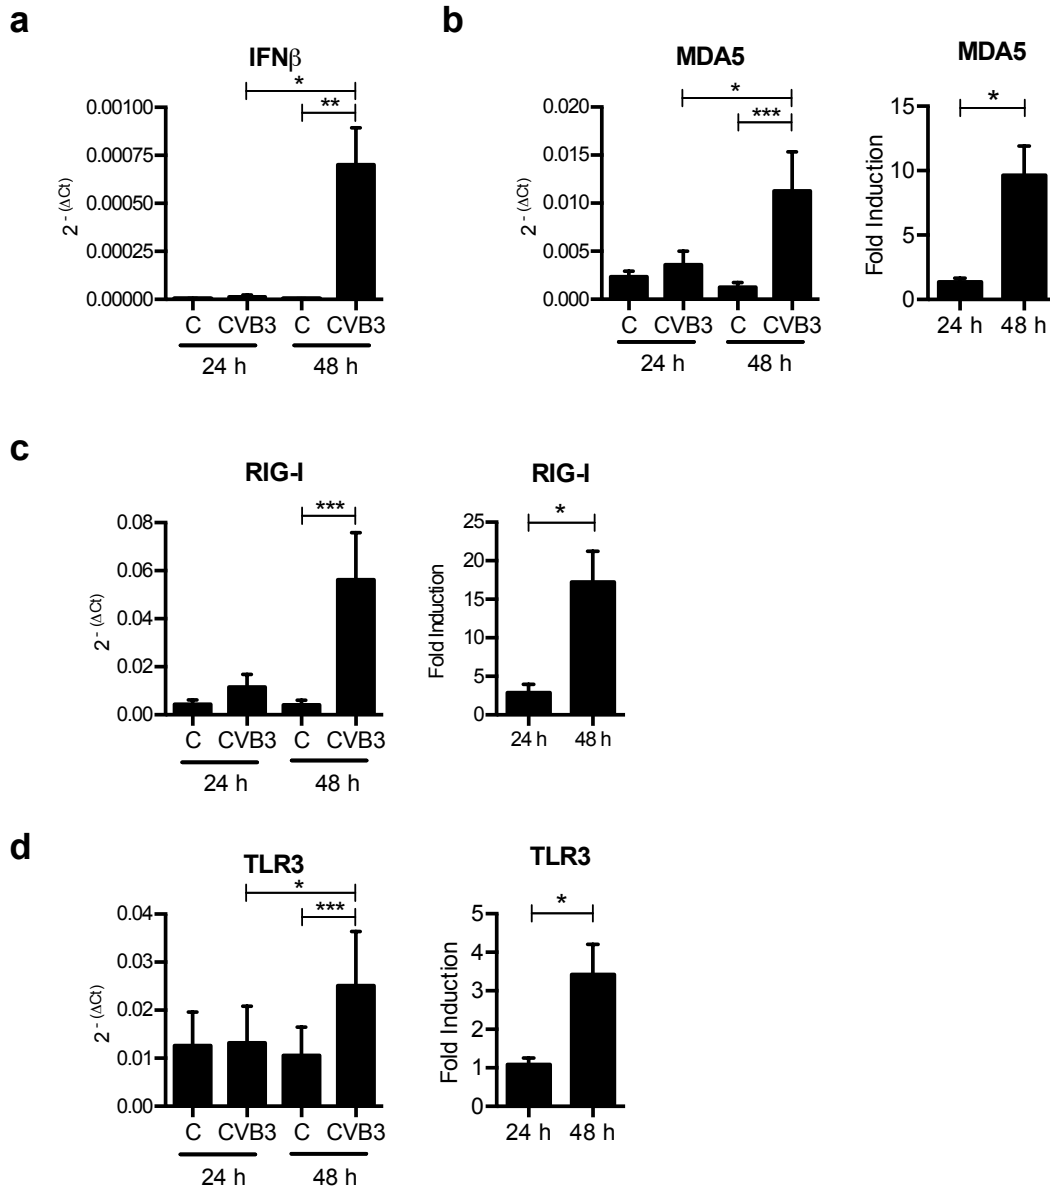

**Supplementary Fig. S1. Human pancreatic islets respond to CVB3 infection by upregulating the expression of IFNβ and PRRs.**

Human islets from seven donors were infected with CVB3. At 24 h and 48 h p.i. total mRNA was isolated and the expression levels of IFNβ (A), MDA5 (B), RIG-I (C) and TLR3 (D) were determined using quantitative real-time (RT)-PCR. The expression levels were normalized to GAPDH and presented as  $2^{-(\Delta Ct)}$ , or normalized to GAPDH and compared to uninfected control from the same donor and presented as  $2^{-(\Delta\Delta Ct)}$ .

Data is shown as mean  $\pm$  SEM, \*  $p < 0.05$ , \*\*  $p < 0.01$ , \*\*\*  $p < 0.001$ , Friedmann test with Dunns correction or Wilcoxon's matched-paired signed test.

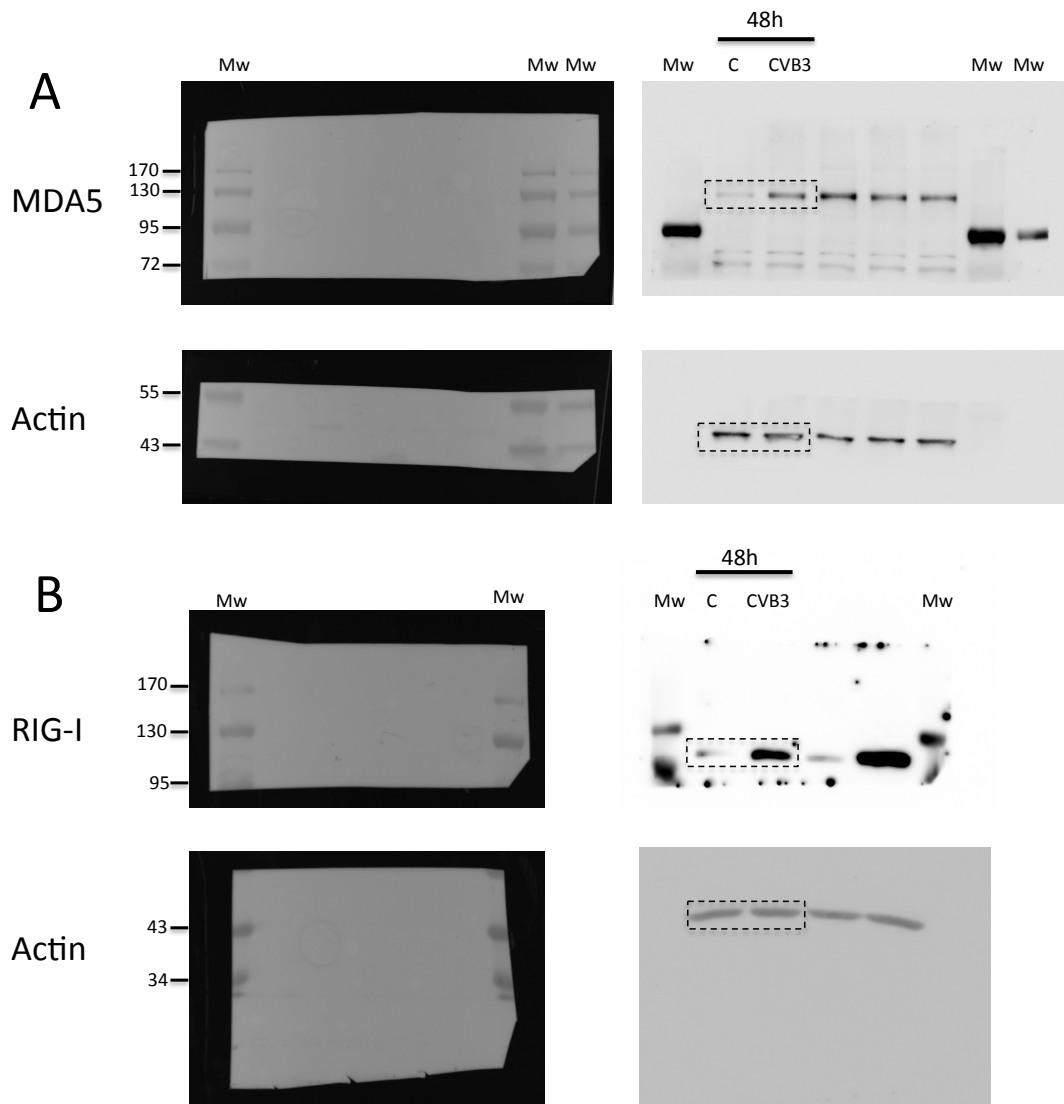

**Supplementary Fig. S2: Uncropped full-length images of Western blot membranes presented in the main Figure 2d.**

As indicated, the membranes were cut to enable simultaneous blotting for two antibodies MDA5 (A) or RIG-I (B) and actin without the need for membrane stripping.



### T1D associated genes

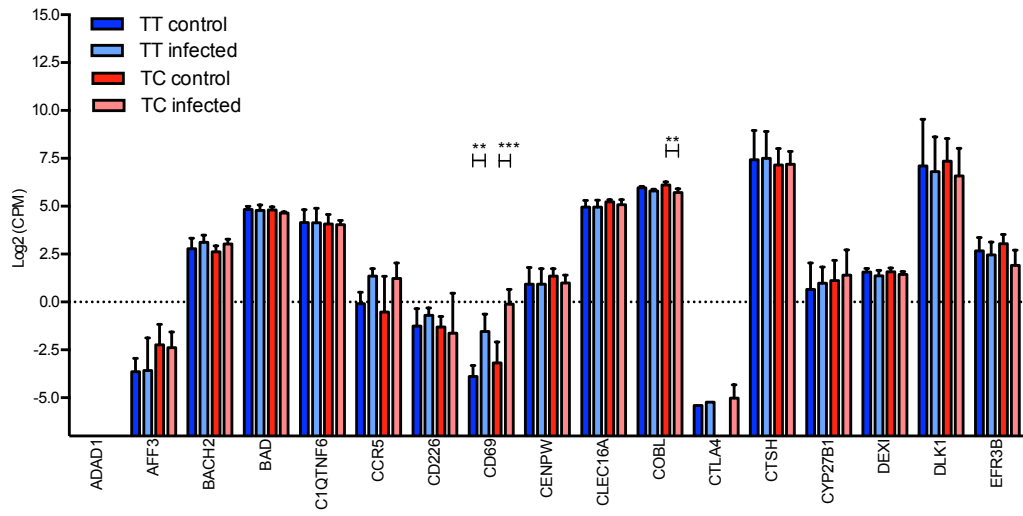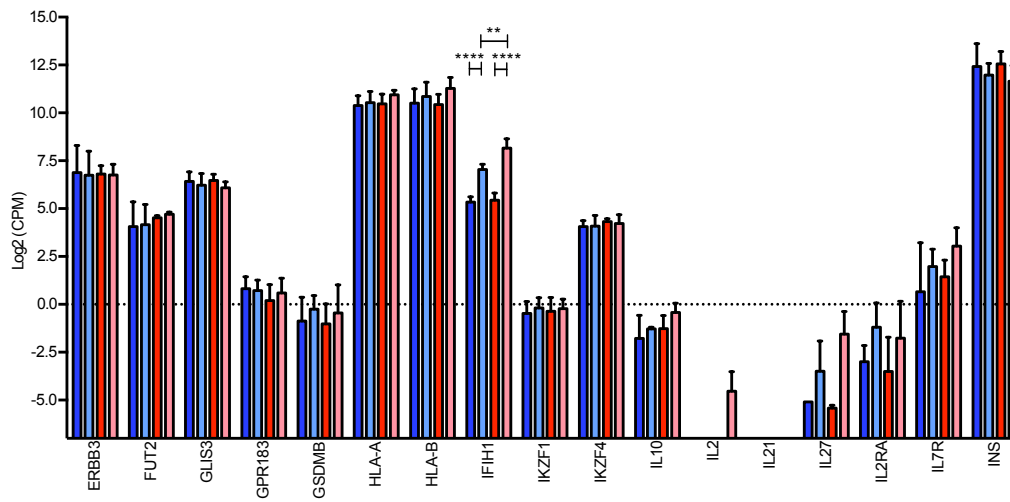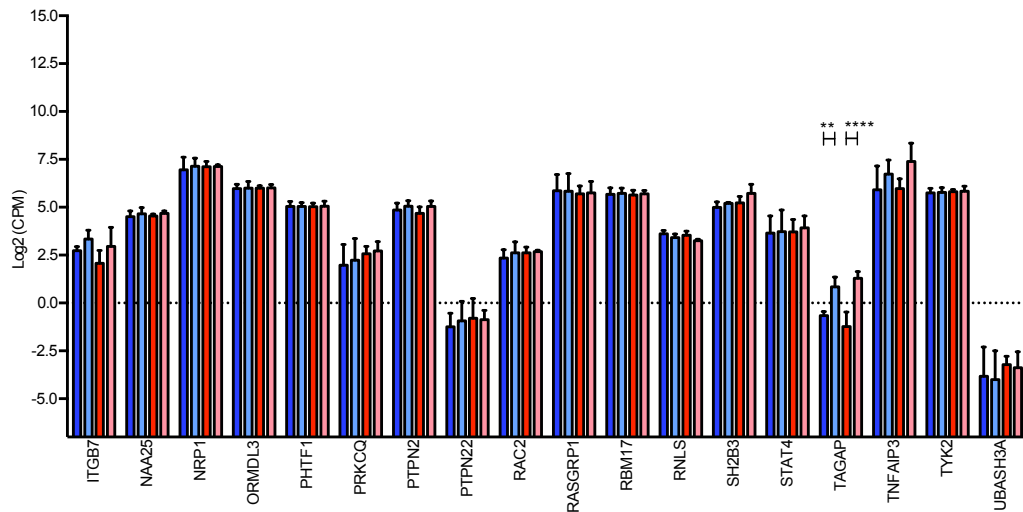

**Supplementary Fig. S3: Four T1D-associated genes (CD69, COLB, IFIH1, TAGAP) are differentially expressed in pancreatic human islets upon CVB3 infection.**

RNA sequencing was performed on RNA isolated from non-infected and CVB3 infected primary human islets 48 h p.i. The mRNA abundance of genes associated with type 1 diabetes (except of HLA II genes, based on [www.T1Dbase.org](http://www.T1Dbase.org), analysis made on May 23rd, 2016) is shown as  $\log_2(\text{CPM})$  in control and CVB3 infected islets carrying the rs1990760 TT (TT control, TT infected) and TC genotype (TC control, TC infected). Data is shown as mean  $\pm$  SEM, \*\*  $p < 0.01$ , \*\*\*  $p < 0.001$ , \*\*\*\*  $p < 0.0001$ , one-way ANOVA with Bonferroni correction.
